# Supplementary material for: The Extract of Scutellaria baicalensis Attenuates the Pattern Recognition Receptor Pathway Activation Induced by Influenza A Virus in Macrophages
Source: MDPI journal article supplement (doi:10.3390/v15071524), 2023-07-08
Supplement: s1 [file s1]

**Supplementary Table S1.** Ultra-high-pressure liquid chromatography time-of-flight mass spectrometer (UPLC/Q-TOF MS) analysis of SBE.

| No. | Component                  | Formula                                         | RT(min) | Ion                | Theoretical(m/z) | Measured(m/z) | Error(ppm) | MS <sup>2</sup> (m/z)                                                                                                                                                                                                                                                                                           |
|-----|----------------------------|-------------------------------------------------|---------|--------------------|------------------|---------------|------------|-----------------------------------------------------------------------------------------------------------------------------------------------------------------------------------------------------------------------------------------------------------------------------------------------------------------|
| 1   | Scutellarin                | C <sub>21</sub> H <sub>18</sub> O <sub>12</sub> | 3.23    | [M-H] <sup>-</sup> | 461.0720         | 461.0714      | -1.30      | 461.0714[M-H] <sup>-</sup> , 923.151[2M-H] <sup>-</sup> , 285.0406[M-H-C <sub>6</sub> H <sub>8</sub> O <sub>6</sub> ] <sup>-</sup>                                                                                                                                                                              |
|     |                            |                                                 | 3.37    | [M+H] <sup>+</sup> | 463.0877         | 463.0880      | 0.65       | 463.0880 [M+H] <sup>+</sup> , 287.0557 [M+H-C <sub>6</sub> H <sub>8</sub> O <sub>6</sub> ] <sup>+</sup> , 169.0182[M+H-C <sub>6</sub> H <sub>10</sub> O <sub>5</sub> -C <sub>8</sub> H <sub>5</sub> O] <sup>+</sup> , 755.2402 [M-H] <sup>-</sup> .                                                             |
| 2   | Baicalin                   | C <sub>21</sub> H <sub>18</sub> O <sub>11</sub> | 4.63    | [M-H] <sup>-</sup> | 445.0771         | 445.0771      | 0.00       | 445.0771[M-H] <sup>-</sup> , 891.1635 [2M-H] <sup>-</sup> , 269.0449 [M-H-C <sub>6</sub> H <sub>8</sub> O <sub>6</sub> ] <sup>-</sup>                                                                                                                                                                           |
|     |                            |                                                 | 4.89    | [M+H] <sup>+</sup> | 447.0927         | 447.0927      | 0.00       | 447.0927[M+H] <sup>+</sup> , 271.0606[M+H-C <sub>6</sub> H <sub>8</sub> O <sub>6</sub> ] <sup>+</sup> , 169.0145[M+H-C <sub>6</sub> H <sub>8</sub> O <sub>6</sub> -C <sub>8</sub> H <sub>6</sub> ] <sup>+</sup>                                                                                                 |
| 3   | Chrysin-7-O-glucuronide    | C <sub>21</sub> H <sub>18</sub> O <sub>10</sub> | 5.30    | [M-H] <sup>-</sup> | 429.0822         | 429.0816      | -1.40      | 103.0554[M+H-C <sub>7</sub> H <sub>4</sub> O <sub>5</sub> ] <sup>+</sup> , 253.0499 [M-H-C <sub>6</sub> H <sub>8</sub> O <sub>6</sub> ] <sup>-</sup> , 151.0242[M-H-C <sub>6</sub> H <sub>8</sub> O <sub>6</sub> -C <sub>8</sub> H <sub>6</sub> ] <sup>-</sup>                                                  |
|     |                            |                                                 | 5.57    | [M+H] <sup>+</sup> | 431.0978         | 431.0981      | 0.70       | 431.0981[M+H] <sup>+</sup> , 255.0665[M+H-C <sub>6</sub> H <sub>8</sub> O <sub>6</sub> ] <sup>+</sup> , 153.0246[M+H-C <sub>6</sub> H <sub>8</sub> O <sub>6</sub> -C <sub>8</sub> H <sub>6</sub> ] <sup>+</sup>                                                                                                 |
| 4   | Oroxylin A-7-O-glucuronide | C <sub>22</sub> H <sub>20</sub> O <sub>11</sub> | 5.34    | [M-H] <sup>-</sup> | 459.0927         | 459.0923      | -0.87      | 135.0240[M+H-C <sub>6</sub> H <sub>8</sub> O <sub>6</sub> -C <sub>8</sub> H <sub>6</sub> -H <sub>2</sub> O] <sup>+</sup> , 919.1946[2 M-H] <sup>-</sup> , 459.0923[M-H] <sup>-</sup> , 283.0605[M-H-C <sub>6</sub> H <sub>8</sub> O <sub>6</sub> ] <sup>-</sup>                                                 |
|     |                            |                                                 | 5.59    | [M+H] <sup>+</sup> | 461.1084         | 461.1086      | 0.43       | 461.1086[M+H] <sup>+</sup> , 285.0768 [M+H-C <sub>6</sub> H <sub>8</sub> O <sub>6</sub> ] <sup>+</sup> , 255.0663 [M+2H-C <sub>6</sub> H <sub>8</sub> O <sub>6</sub> -OCH <sub>3</sub> ] <sup>+</sup> , 183.0237[M+H-C <sub>6</sub> H <sub>8</sub> O <sub>6</sub> -C <sub>8</sub> H <sub>6</sub> ] <sup>+</sup> |
| 5   | Wogonoside                 | C <sub>22</sub> H <sub>20</sub> O <sub>11</sub> | 5.63    | [M-H] <sup>-</sup> | 459.0927         | 459.0927      | 0.00       | 919.1943[2M-H] <sup>-</sup> , 459.0927[M-H] <sup>-</sup> , 283.0601[M-H-C <sub>6</sub> H <sub>8</sub> O <sub>6</sub> ] <sup>-</sup>                                                                                                                                                                             |
|     |                            |                                                 | 5.60    | [M+H] <sup>+</sup> | 461.1084         | 461.1089      | 1.08       | 461.1089[M+H] <sup>+</sup> , 483.0907 [M+Na] <sup>+</sup> , 285.0766 [M+H-C <sub>6</sub> H <sub>8</sub> O <sub>6</sub> ] <sup>+</sup> , 183.1506[M+H-C <sub>6</sub> H <sub>8</sub> O <sub>6</sub> -C <sub>8</sub> H <sub>6</sub> ] <sup>+</sup>                                                                 |
| 6   | Salvigenin                 | C <sub>18</sub> H <sub>16</sub> O <sub>6</sub>  | 7.09    | [M-H] <sup>-</sup> | 327.0869         | 327.0872      | 0.92       | 327.0872[M-H] <sup>-</sup> , 195.0221[M-H-C <sub>9</sub> H <sub>8</sub> O] <sup>-</sup>                                                                                                                                                                                                                         |
|     |                            |                                                 | 7.45    | [M+H] <sup>+</sup> | 329.1025         | 329.1027      | 0.61       | 329.1027 [M+H] <sup>+</sup> , 351.0841[M+Na] <sup>+</sup> , 197.0243[M+H-C <sub>9</sub> H <sub>8</sub> O] <sup>+</sup>                                                                                                                                                                                          |
| 7   | Wogonin                    | C <sub>16</sub> H <sub>12</sub> O <sub>5</sub>  | 7.72    | [M-H] <sup>-</sup> | 283.0606         | 283.0606      | 0.00       | 498.2899[M-H] <sup>-</sup> , 434.0767[M-H-SO <sub>2</sub> ] <sup>-</sup> , 181.0219[M-H-C <sub>6</sub> H <sub>8</sub> O <sub>6</sub> -C <sub>8</sub> H <sub>6</sub> ] <sup>-</sup> , 285.0760[M+H] <sup>+</sup> , 307.0576[M+Na] <sup>+</sup>                                                                   |
|     |                            |                                                 | 8.10    | [M+H] <sup>+</sup> | 285.0763         | 285.0760      | -1.05      | 255.0665[M+2H-OCH <sub>3</sub> ] <sup>+</sup> , 183.0246[M+H-C <sub>6</sub> H <sub>8</sub> O <sub>6</sub> -C <sub>8</sub> H <sub>6</sub> ] <sup>+</sup>                                                                                                                                                         |

**Supplementary Table S2.** Primers for RT-qPCR used in this study.

| Genes        | Sequence (5'- 3')         | Orientation |
|--------------|---------------------------|-------------|
| NP           | CCAGCAAAAGCAGGGTAGATAA    | Forward     |
| NP           | CCCAGTAGAAACAAGGGTATTTT   | Reverse     |
| IL-1 $\beta$ | TTCAGGCAGGCAGTATCACTCATTG | Forward     |
| IL-1 $\beta$ | TGTCGTTGCTTGTTCTCCTTGAC   | Reverse     |
| IL-6         | CTTCTTGGGACTGATGCTGGTGAC  | Forward     |
| IL-6         | CTCTCTGAAGGACTCTGGCTTTGTC | Reverse     |
| TLR3         | CCTTGCGTTGCGAAGTGAAGAAC   | Forward     |
| TLR3         | GAGAAGGAACCGTTGCCGACATC   | Reverse     |
| TLR7         | AGATGTCCTTGGCTCCCTTCTCAG  | Forward     |
| TLR7         | GTGGCGGTCAGAGGATAACTTGTG  | Reverse     |
| TLR8         | GTGGAAATCGTCTTGACCGTTTGTG | Forward     |
| TLR8         | GGAAGCCAGAGGGTAGGTGAGAG   | Reverse     |
| RIG-I        | ACGATGTCCGAGAAGCAGCATTC   | Forward     |
| RIG-I        | CATCAGCGACCGAGGTAGCAATC   | Reverse     |
| MDA5         | AAGAAGAAGCAGGCATCTGAATCCG | Forward     |
| MDA5         | ACACCGTCATCGTCTCCACTCTC   | Reverse     |
| NLRP3        | CTCTGTTCACTGGCTGCGGATG    | Forward     |
| NLRP3        | TGGTCCTTTCCTCACGGTCTCC    | Reverse     |
| NLRC4        | GCGAGTCTGGCAAAGGGAAGTC    | Forward     |
| NLRC4        | CCGTGGTGGTGGTGACAATGAC    | Reverse     |
| NLRC5        | TGGAGATGAGGTGGCTGCTGAG    | Forward     |
| NLRC5        | GTCTTGAGAAGTCCGTTGGGTTC   | Reverse     |
| cGAS         | CTTCCCAGCCTGACATTGCCTTC   | Forward     |
| cGAS         | GCCACGCTTCCTGCTATGATGAC   | Reverse     |
| IFI202       | CCTCAAGCCTCTCCTGGACCTAAC  | Forward     |
| IFI202       | CTCTAGGATGCCACTGCTGTTGAAG | Reverse     |
| IFI204       | TGTGTTAGAGGCTGCTCCTGACC   | Forward     |
| IFI204       | CCACCACTTCTATGCTTCCTGAACC | Reverse     |
| MyD88        | GATTCTCTGATGCCGTCTGTCTAC  | Forward     |
| MyD88        | AACTCCTGATTCTCCTGCCTCTACC | Reverse     |

|       |                           |         |
|-------|---------------------------|---------|
| MAVS  | CCTCCTCGCTTCTCCACTCCTG    | Forward |
| MAVS  | TCTGCCTCTCACACTCTCACCTTAG | Reverse |
| ASC   | GCAACTGCGAGAAGGCTATGGG    | Forward |
| ASC   | CTCATCTTGTCTTGGCTGGTGGTC  | Reverse |
| IRF7  | GGCTCGGACGCTGGATTAACAC    | Forward |
| IRF7  | CACAGGCAGTCTGGGAGAATCAAAG | Reverse |
| IL-10 | GGACAACATACTGCTAACCGACTCC | Forward |
| IL-10 | CTTCACCTGCTCCACTGCCTTG    | Reverse |
| IL-15 | TCAGCAGATAACCAGCCTACAGGAG | Forward |
| IL-15 | ATGAAGACATGAATGCCAGCCTCAG | Reverse |
| IL-18 | AGCCGCCTCAAACCTTCCAAATC   | Forward |
| IL-18 | GTCACAGCCAGTCCTCTTACTTCAC | Reverse |
| IFI35 | CTTCACTGCCAACCCTGCTCTG    | Forward |
| IFI35 | ACTTGCCTGCCCTGCTTAGTTTG   | Reverse |
| NMI   | CACAGGCGTCAGATTCCAGGTTC   | Forward |
| NMI   | GTAAGTCCTCCCCAGTCTCCTCATC | Reverse |
| GAPDH | TCACCATCTTCCAGGAGCGAGAC   | Forward |
| GAPDH | TGAGCCCTTCCACAATGCCAAAG   | Reverse |

---

**Supplementary Table S3.** Summary of RNA-seq data analysis.

| <b>Sample Name</b> | <b>Raw Reads</b> | <b>Raw Base</b> | <b>Clean Reads</b> | <b>Clean Base</b> | <b>Q20</b> | <b>Q30</b> | <b>GC content</b> |
|--------------------|------------------|-----------------|--------------------|-------------------|------------|------------|-------------------|
| Mock-1             | 57.88M           | 8.68G           | 55.39M             | 8.31G             | 97.48%     | 92.42%     | 50.45%            |
| Mock-2             | 63.92M           | 9.59G           | 61.41M             | 9.21G             | 97.41%     | 92.24%     | 50.61%            |
| Mock-3             | 56.26M           | 8.44G           | 53.93M             | 8.09G             | 97.41%     | 92.20%     | 50.34%            |
| PR8-1              | 61.06M           | 9.16G           | 58.12M             | 8.72G             | 97.68%     | 92.98%     | 50.21%            |
| PR8-2              | 43.36M           | 6.50G           | 41.42M             | 6.21G             | 96.88%     | 90.46%     | 49.86%            |
| PR8-3              | 26.07M           | 3.91G           | 24.55M             | 3.68G             | 98.35%     | 94.68%     | 49.58%            |
| SBE-1              | 75.28M           | 11.29G          | 71.93M             | 10.79G            | 97.69%     | 93.02%     | 50.55%            |
| SBE-2              | 46.32M           | 6.95G           | 43.86M             | 6.58G             | 98.16%     | 94.37%     | 50.47%            |
| SBE-3              | 61.76M           | 9.26G           | 58.83M             | 8.82G             | 97.67%     | 92.75%     | 50.16%            |

Mock-1, Mock-2, and Mock-3: three biological replicates of the normal cell samples; PR8-1, PR8-2 and PR8-3: three biological replicates of the PR8-infected samples; SBE-1, SBE-2, and SBE-3: three biological replicates of SBE treatment with PR8-infected samples.

**Supplementary Table S4.** Reference genome alignment statistics.

| <b>Sample<br/>Name</b> | <b>Total<br/>CleanReads</b> | <b>Total<br/>MappingRatio</b> | <b>Uniquely<br/>MappingRatio</b> | <b>Multi<br/>MappingRatio</b> | <b>Discordantly<br/>MappingRatio</b> |
|------------------------|-----------------------------|-------------------------------|----------------------------------|-------------------------------|--------------------------------------|
| Mock-1                 | 55390370                    | 96.86%                        | 88.59%                           | 5.80%                         | 2.47%                                |
| Mock-2                 | 61411484                    | 96.78%                        | 88.75%                           | 5.45%                         | 2.58%                                |
| Mock-3                 | 53927354                    | 96.87%                        | 88.64%                           | 5.72%                         | 2.51%                                |
| PR8-1                  | 58119812                    | 96.96%                        | 89.35%                           | 5.26%                         | 2.35%                                |
| PR8-2                  | 41423336                    | 96.34%                        | 88.35%                           | 5.18%                         | 2.81%                                |
| PR8-3                  | 24550746                    | 97.78%                        | 90.51%                           | 5.54%                         | 1.73%                                |
| SBE-1                  | 71933730                    | 97.05%                        | 88.96%                           | 5.85%                         | 2.24%                                |
| SBE-2                  | 43859858                    | 97.31%                        | 89.45%                           | 5.83%                         | 2.03%                                |
| SBE-3                  | 58825820                    | 97.00%                        | 89.01%                           | 5.68%                         | 2.31%                                |

Mock-1, Mock-2, and Mock-3: three biological replicates of the normal cell samples; PR8-1, PR8-2 and PR8-3: three biological replicates of the PR8-infected samples; SBE-1, SBE-2, and SBE-3: three biological replicates of SBE treatment with PR8-infected samples.

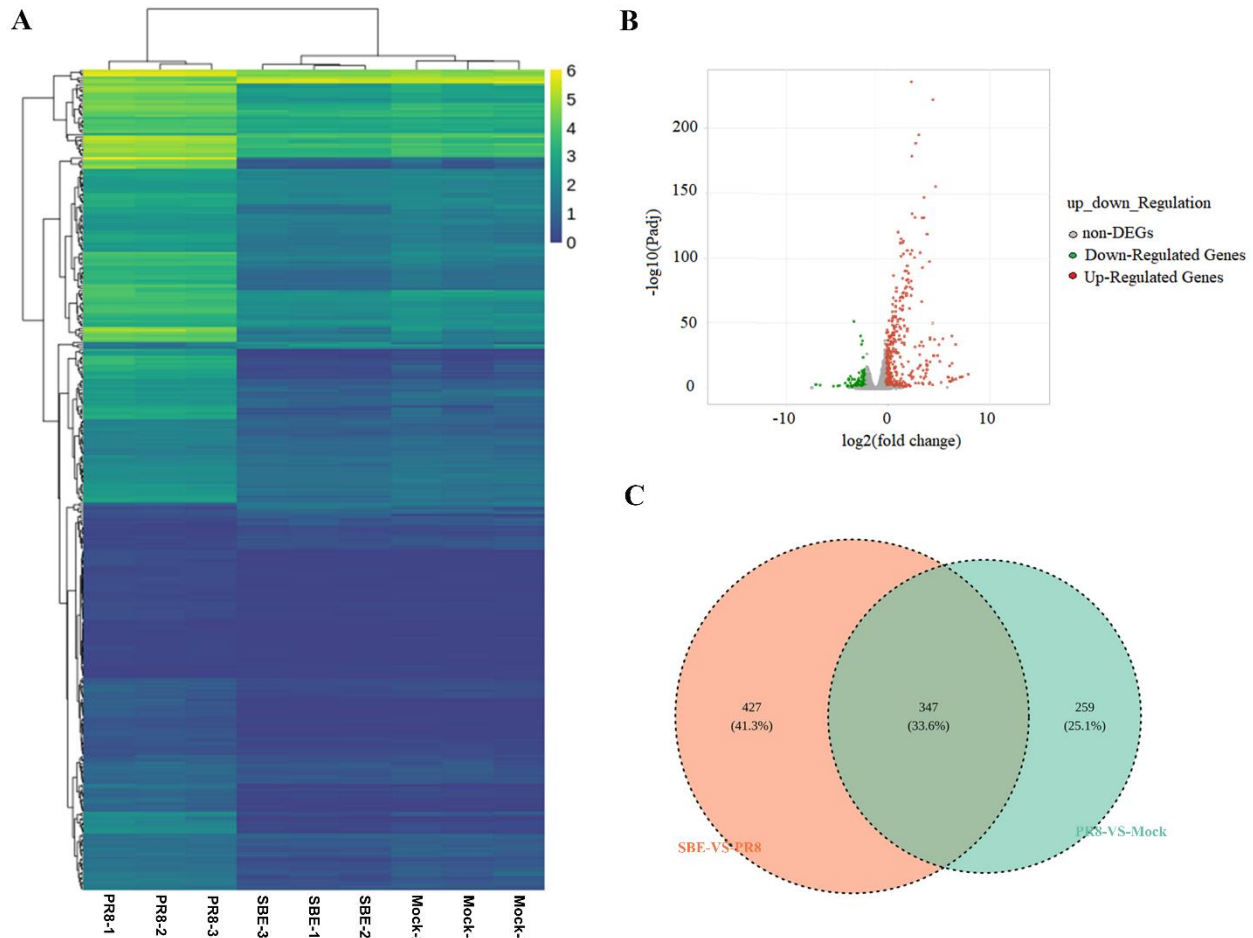

**Supplementary Figure S1.** Analysis of DEGs identified from the samples of Mock, PR8 and SBE groups. (A) Heatmap for cluster analysis of DEGs between Mock, PR8 and SBE groups. The union and inter DEGs were extracted from the results of three groups of differences, and FPKM values of each sample were used for cluster analysis to study the expression changes of DEGs in Mock, PR8 and SBE groups of samples. The color value of the heatmap is  $\log_{10}(\text{FPKM}+1)$ , and the more yellow of the color represents the higher expression level. (B) Volcano plots of the distribution of DEGs between PR8 and Mock groups. The red, green and gray dots represent up-regulated, down-regulated and not significantly regulated genes, respectively. The X-axis indicates the  $\log_2$  (fold change) of DEGs. The Y-axis represents the statistical significance,  $-\log_{10}$  (p-value). (C) Venn diagram shows the union and overlapping DEGs between Mock, PR8 and SBE groups.

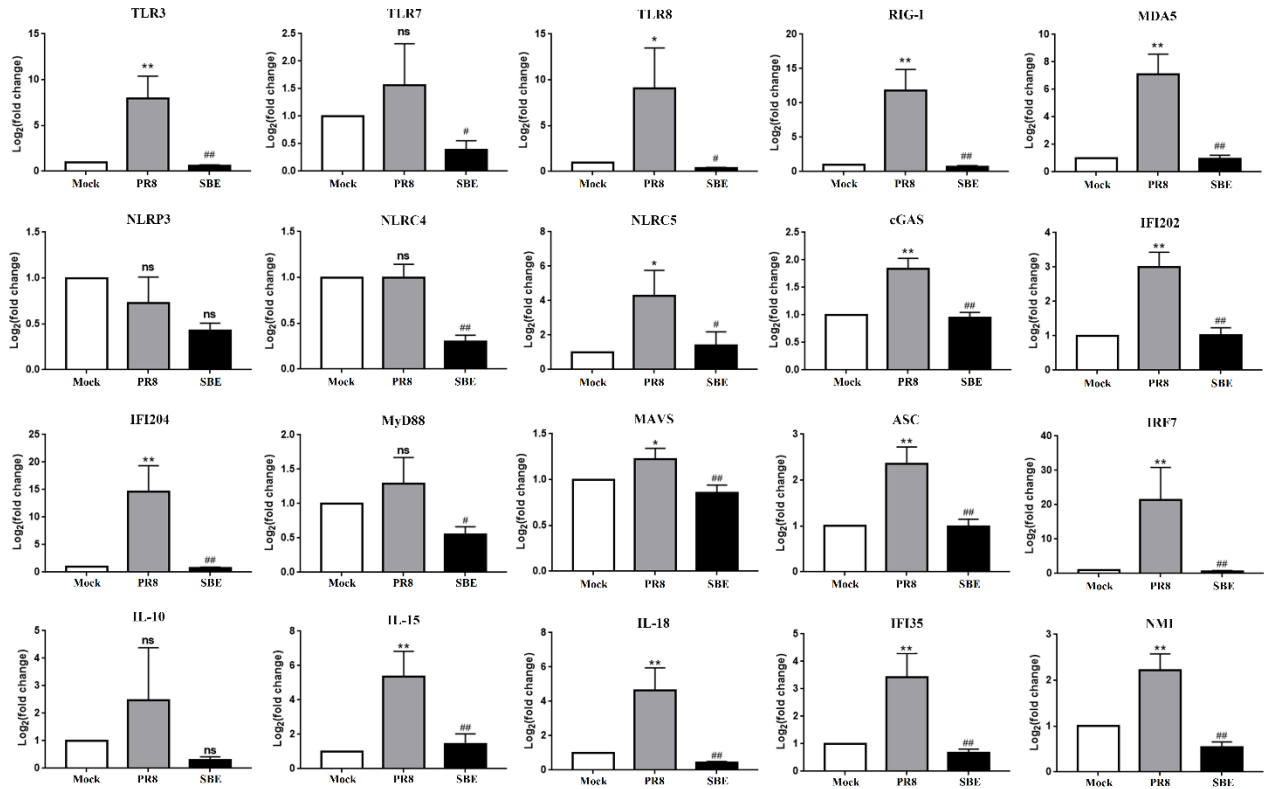

**Supplementary Figure S2.** The mRNA levels of representative DEGs involved in pattern recognition receptor pathways detected by RNA-Seq. The mRNA levels of pattern recognition receptors (TLR3, TLR7, TLR8, RIG-I, MDA5, NLRP3, NLRC4, NLRC5, cGAS, IFI202 and IFI204), adaptors (MyD88, MAVS, ASC), transcript factor IRF7 and downstream effect genes (IL-10, IL-15, IL-18, IFI35 and NMI) in Mock, PR8 and SBE groups were detected by RNA-seq. Data were obtained from three biological replicates. \*  $P < 0.05$ , \*\*  $P < 0.01$  vs Mock group; #  $P < 0.05$ , ##  $P < 0.01$  vs PR8 group; ns indicates no statistical significance.
